# Supplementary material
Source: Springer Nature journal article supplement (https://www.springermedizin.de/resource/supplementary/12891_2010_1099_MOESM1_ESM.pdf/9507716)

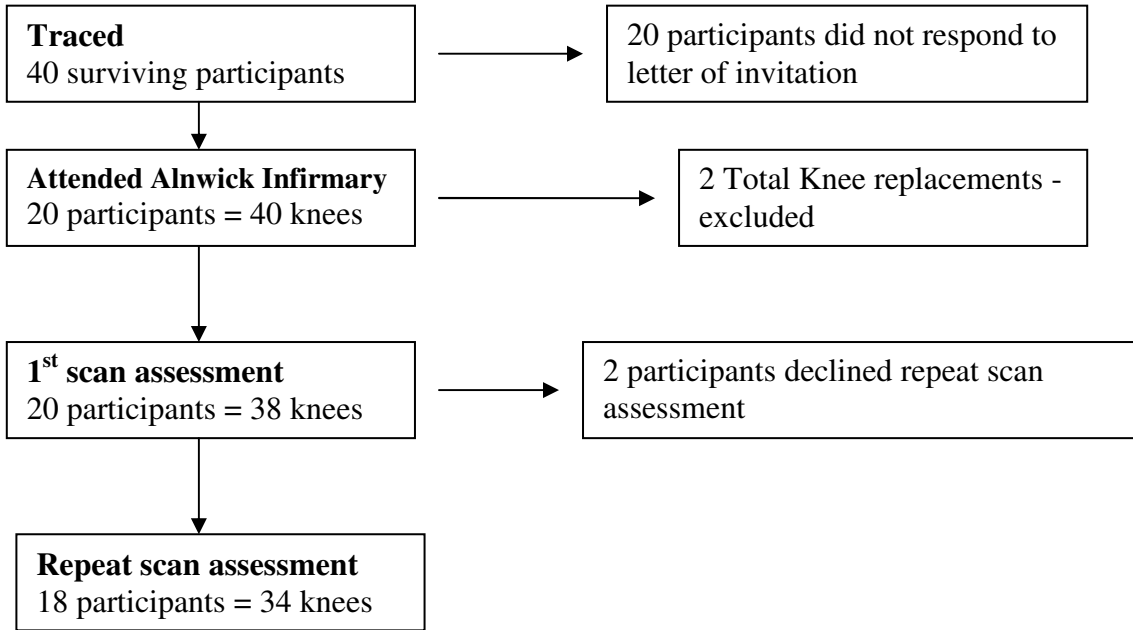

Supplement: MOESM1 [file 9507716]
